# Supplementary material for: Phosphoproteomic Analysis of Thermomorphogenic Responses in Arabidopsis
Source: Front Plant Sci. 2021 Sep 16;12:753148. doi: 10.3389/fpls.2021.753148 (PMC8481946; doi:10.3389/fpls.2021.753148)
Supplement: Supplementary file 1 [file Table_1.XLSX]

## Sheet: Sheet1
Table S1. Primers used in this study.
Name	Purpose	Primer sequences(5'-3')
ATL6- SacI-F	Overexpression	CGAGCTCATGAGAAGCTCCGATCATAT
ATL6-SmaI-R	Overexpression	CCCCCGGGGAACCGGTAATCTCACCGAAC
ATL6(S343A)-F	Overexpression	TTCAACCGGTAGTGATGCAGTACGTGCAGGAGACCG
ATL6(S343A)-R	Overexpression	CGGTCTCCTGCACGTACTGCATCACTACCGGTTGAA
ATL6(S357A)-F	Overexpression	TTTCTTAGAAACGCGGCATTTTTGTGGAGGAAC
ATL6(S357A)-R	Overexpression	GTTCCTCCACAAAAATGCCGCGTTTCTAAGAAA
ATL6-F2	RT-PCR	TGGAAATTGAACCGGACGAA
1306-RP	RT-PCR	CCAAGGGCGAATTGGTCGAC
UBQ5F	RT-PCR	TTGAAGACGGCCGTACCCTC
UBQ5R	RT-PCR	CGCTGAACCTTTCAAGATCCATCG
