# Supplementary material for: Phosphoproteomic Analysis of Thermomorphogenic Responses in Arabidopsis
Source: Front Plant Sci. 2021 Sep 16;12:753148. doi: 10.3389/fpls.2021.753148 (PMC8481946; doi:10.3389/fpls.2021.753148)
Supplement: Supplementary file 2 [file Table_2.XLSX]

## Sheet: 29_Cvs22_C
Table S2. Differentially expressed proteins identified by quantitative proteomics.
Protein accession	Ensembl Genomes	Protein description	29_C/22_C Ratio	Regulated Type	29_C/22_C P value	Gene name	MW [kDa]	Coverage [%]	Peptides	PSMs	Unique peptides	22_R1	22_R2	22_R3	29_R1	29_R2	29_R3	Subcellular localization	Biological Process	Cellular Component	Molecular Function	KEGG KO No.	KEGG Gene	KEGG pathway	IPR ID	Domain description
A8MQS3	AT4G36640	AT4G36640 protein OS=Arabidopsis thaliana OX=3702 GN=AP22.47 PE=2 SV=1	0.718	Down	0.0040158	AP22.47	27.091	3.8	1	1	1	1.233	1.142	1.158	0.922	0.773	0.841	nucleus							IPR001251;	CRAL-TRIO lipid binding domain;
Q41932	AT4G05180	Oxygen-evolving enhancer protein 3-2, chloroplastic OS=Arabidopsis thaliana OX=3702 GN=PSBQ2 PE=1 SV=2	0.767	Down	0.0027367	PSBQ2	24.643	10.4	2	4	1	1.111	1.215	1.097	0.865	0.845	0.916	chloroplast	GO:0008152 metabolic process; GO:0044237 cellular metabolic process; GO:0009987 cellular process; GO:0015979 photosynthesis;	GO:0016020 membrane; GO:0009535 chloroplast thylakoid membrane; GO:0019898 extrinsic component of membrane; GO:0044434 chloroplast part; GO:0098796 membrane protein complex; GO:0005737 cytoplasm; GO:0009534 chloroplast thylakoid; GO:0009654 photosystem II oxygen evolving complex; GO:0042651 thylakoid membrane; GO:0032991 macromolecular complex; GO:0044424 intracellular part; GO:0005623 cell; GO:0…	GO:0043169 cation binding; GO:0046872 metal ion binding; GO:0005509 calcium ion binding; GO:0005488 binding; GO:0043167 ion binding;	K08901	psbQ; photosystem II oxygen-evolving enhancer protein 3	ath00195 Photosynthesis - Arabidopsis thaliana (thale cress); ath01100 Metabolic pathways - Arabidopsis thaliana (thale cress);	IPR023222;	PsbQ-like domain;
Q9LV58	AT3G24500	Multiprotein-bridging factor 1c OS=Arabidopsis thaliana OX=3702 GN=MBF1C PE=1 SV=1	2.527	Up	8.0614e-05	MBF1C	16.403	24.3	3	3	3	0.539	0.578	0.55	1.303	1.359	1.551	cytoplasm	GO:0044700 single organism signaling; GO:0001101 response to acid chemical; GO:0097659 nucleic acid-templated transcription; GO:0009891 positive regulation of biosynthetic process; GO:0044699 single-organism process; GO:0009058 biosynthetic process; GO:0044237 cellular metabolic process; GO:2001141 regulation of RNA biosynthetic process; GO:0008152 metabolic process; GO:0007165 signal transductio…	GO:0043229 intracellular organelle; GO:0043232 intracellular non-membrane-bounded organelle; GO:0044446 intracellular organelle part; GO:0005737 cytoplasm; GO:0031981 nuclear lumen; GO:0044424 intracellular part; GO:0005730 nucleolus; GO:0005623 cell; GO:0044422 organelle part; GO:0043228 non-membrane-bounded organelle; GO:0043231 intracellular membrane-bounded organelle; GO:0043226 organelle; GO…	GO:0097159 organic cyclic compound binding; GO:1901363 heterocyclic compound binding; GO:0003677 DNA binding; GO:0005488 binding; GO:0001071 nucleic acid binding transcription factor activity; GO:0003676 nucleic acid binding; GO:0000989 transcription factor activity, transcription factor binding; GO:0003713 transcription coactivator activity; GO:0003712 transcription cofactor activity; GO:0043565…	K03627	MBF1; putative transcription factor		IPR010982; IPR013729; IPR001387;	Lambda repressor-like, DNA-binding domain; Multiprotein bridging factor 1, N-terminal; Cro/C1-type helix-turn-helix domain;
O49707	AT4G21840	Peptide methionine sulfoxide reductase B8 OS=Arabidopsis thaliana OX=3702 GN=MSRB8 PE=2 SV=1	0.738	Down	0.0025558	MSRB8	15.429	37.1	5	7	3	1.249	1.133	1.105	0.895	0.858	0.82	chloroplast	GO:0006950 response to stress; GO:0055114 oxidation-reduction process; GO:0044267 cellular protein metabolic process; GO:0044699 single-organism process; GO:0030091 protein repair; GO:0044238 primary metabolic process; GO:0050896 response to stimulus; GO:0044237 cellular metabolic process; GO:0071704 organic substance metabolic process; GO:0008152 metabolic process; GO:0044710 single-organism met…	GO:0044464 cell part; GO:0005622 intracellular; GO:0005737 cytoplasm; GO:0044424 intracellular part; GO:0005623 cell; GO:0005829 cytosol; GO:0044444 cytoplasmic part;	GO:0003824 catalytic activity; GO:0005488 binding; GO:0043167 ion binding; GO:0016667 oxidoreductase activity, acting on a sulfur group of donors; GO:0033743 peptide-methionine (R)-S-oxide reductase activity; GO:0043169 cation binding; GO:0046872 metal ion binding; GO:0016671 oxidoreductase activity, acting on a sulfur group of donors, disulfide as acceptor; GO:0016491 oxidoreductase activity;	K07305	msrB; peptide-methionine (R)-S-oxide reductase [EC:1.8.4.12]		IPR002579; IPR011057;	Peptide methionine sulphoxide reductase MrsB; Mss4-like;
Q0WPF2	AT4G04885	Polyadenylation and cleavage factor homolog 4 OS=Arabidopsis thaliana OX=3702 GN=PCFS4 PE=1 SV=1	1.501	Up	0.00163676	PCFS4	89.227	5.7	4	7	4	0.768	0.841	0.775	1.301	1.125	1.152	nucleus	GO:0009909 regulation of flower development; GO:0022414 reproductive process; GO:0097659 nucleic acid-templated transcription; GO:0044699 single-organism process; GO:0009058 biosynthetic process; GO:0044237 cellular metabolic process; GO:0006353 DNA-templated transcription, termination; GO:0008152 metabolic process; GO:0051240 positive regulation of multicellular organismal process; GO:0044702 si…	GO:0043229 intracellular organelle; GO:0044446 intracellular organelle part; GO:0005737 cytoplasm; GO:0032991 macromolecular complex; GO:0031981 nuclear lumen; GO:0044424 intracellular part; GO:0005623 cell; GO:0044422 organelle part; GO:0005849 mRNA cleavage factor complex; GO:0043231 intracellular membrane-bounded organelle; GO:0043226 organelle; GO:0031974 membrane-enclosed lumen; GO:0005654 n…	GO:0003723 RNA binding; GO:0001099 basal RNA polymerase II transcription machinery binding; GO:0043167 ion binding; GO:0000993 RNA polymerase II core binding; GO:0044877 macromolecular complex binding; GO:0005515 protein binding; GO:0070063 RNA polymerase binding; GO:1901363 heterocyclic compound binding; GO:0097159 organic cyclic compound binding; GO:0003729 mRNA binding; GO:0043175 RNA polymera…	K14400	PCF11; pre-mRNA cleavage complex 2 protein Pcf11	ath03015 mRNA surveillance pathway - Arabidopsis thaliana (thale cress);	IPR006903; IPR006569; IPR007087; IPR008942;	RNA polymerase II-binding domain; CID domain; Zinc finger, C2H2; ENTH/VHS;
Q94CH6	AT1G75900	GDSL esterase/lipase EXL3 OS=Arabidopsis thaliana OX=3702 GN=EXL3 PE=2 SV=1	0.744	Down	0.0167989	EXL3	39.815	6.9	2	3	2	1.011	1.212	1.239	0.915	0.855	0.806	extracellular	GO:0016042 lipid catabolic process; GO:1901575 organic substance catabolic process; GO:0008152 metabolic process; GO:0044710 single-organism metabolic process; GO:0044712 single-organism catabolic process; GO:0044699 single-organism process; GO:0044238 primary metabolic process; GO:0009056 catabolic process; GO:0071704 organic substance metabolic process; GO:0006629 lipid metabolic process;	GO:0005576 extracellular region;	GO:0016787 hydrolase activity; GO:0016298 lipase activity; GO:0003824 catalytic activity; GO:0016788 hydrolase activity, acting on ester bonds;				IPR001087; IPR013830;	GDSL lipase/esterase; SGNH hydrolase-type esterase domain;
Q9SYK0	AT1G05590	Beta-hexosaminidase 2 OS=Arabidopsis thaliana OX=3702 GN=HEXO2 PE=1 SV=1	0.758	Down	0.024044	HEXO2	64.99	2.4	1	1	1	1.044	1.25	1.147	0.824	0.809	0.974	chloroplast	GO:0008152 metabolic process; GO:0005975 carbohydrate metabolic process; GO:0044238 primary metabolic process; GO:0071704 organic substance metabolic process;	GO:0016020 membrane; GO:0005623 cell; GO:0044464 cell part; GO:0071944 cell periphery; GO:0005886 plasma membrane;	GO:0016758 transferase activity, transferring hexosyl groups; GO:0003824 catalytic activity; GO:0016798 hydrolase activity, acting on glycosyl bonds; GO:0035251 UDP-glucosyltransferase activity; GO:0004563 beta-N-acetylhexosaminidase activity; GO:0004553 hydrolase activity, hydrolyzing O-glycosyl compounds; GO:0008194 UDP-glycosyltransferase activity; GO:0046527 glucosyltransferase activity; GO:0…	K12373	HEXA_B; hexosaminidase [EC:3.2.1.52]	ath00511 Other glycan degradation - Arabidopsis thaliana (thale cress); ath00520 Amino sugar and nucleotide sugar metabolism - Arabidopsis thaliana (thale cress); ath00531 Glycosaminoglycan degradation - Arabidopsis thaliana (thale cress); ath00603 Glycosphingolipid biosynthesis - globo and isoglobo series - Arabidopsis thaliana (thale cress); ath00604 Glycosphingolipid biosynthesis - ganglio ser…	IPR029018; IPR015883; IPR029019; IPR017853; IPR013781;	Chitobiase/beta-hexosaminidase domain 2-like; Glycoside hydrolase family 20, catalytic domain; Beta-hexosaminidase, eukaryotic type, N-terminal; Glycoside hydrolase superfamily; Glycoside hydrolase, catalytic domain;
P56761	ATCG00270	Photosystem II D2 protein OS=Arabidopsis thaliana OX=3702 GN=psbD PE=1 SV=3	0.702	Down	0.0048999	psbD	39.547	8.8	2	3	2	1.176	1.283	1.098	0.767	0.838	0.892	cytoplasm	GO:0055114 oxidation-reduction process; GO:0044267 cellular protein metabolic process; GO:0044763 single-organism cellular process; GO:0044699 single-organism process; GO:0019684 photosynthesis, light reaction; GO:0044238 primary metabolic process; GO:0044237 cellular metabolic process; GO:0071704 organic substance metabolic process; GO:0009772 photosynthetic electron transport in photosystem II;…	GO:0016020 membrane; GO:0009535 chloroplast thylakoid membrane; GO:0044434 chloroplast part; GO:0098796 membrane protein complex; GO:0005737 cytoplasm; GO:0009534 chloroplast thylakoid; GO:0042651 thylakoid membrane; GO:0031224 intrinsic component of membrane; GO:0032991 macromolecular complex; GO:0044424 intracellular part; GO:0005623 cell; GO:0044422 organelle part; GO:0044425 membrane part; GO…	GO:0097159 organic cyclic compound binding; GO:1901363 heterocyclic compound binding; GO:0009055 electron carrier activity; GO:0045156 electron transporter, transferring electrons within the cyclic electron transport pathway of photosynthesis activity; GO:0003824 catalytic activity; GO:0005488 binding; GO:0043167 ion binding; GO:0046872 metal ion binding; GO:0043169 cation binding; GO:0046906 tet…	K02706	psbD; photosystem II P680 reaction center D2 protein [EC:1.10.3.9]	ath00195 Photosynthesis - Arabidopsis thaliana (thale cress); ath01100 Metabolic pathways - Arabidopsis thaliana (thale cress);
Q42404	AT3G50670	U1 small nuclear ribonucleoprotein 70 kDa OS=Arabidopsis thaliana OX=3702 GN=RNU1 PE=1 SV=1	1.339	Up	0.021596	RNU1	50.388	14.5	6	7	6	0.975	0.826	0.764	1.231	1.097	1.107	nucleus	GO:0006396 RNA processing; GO:0006725 cellular aromatic compound metabolic process; GO:1901360 organic cyclic compound metabolic process; GO:0006807 nitrogen compound metabolic process; GO:0044238 primary metabolic process; GO:0044237 cellular metabolic process; GO:0071704 organic substance metabolic process; GO:0006397 mRNA processing; GO:0016070 RNA metabolic process; GO:0000398 mRNA splicing, …	GO:0005685 U1 snRNP; GO:0005684 U2-type spliceosomal complex; GO:0032991 macromolecular complex; GO:0044424 intracellular part; GO:0016604 nuclear body; GO:0005623 cell; GO:0071011 precatalytic spliceosome; GO:0044422 organelle part; GO:0031974 membrane-enclosed lumen; GO:0005654 nucleoplasm; GO:0070013 intracellular organelle lumen; GO:0016607 nuclear speck; GO:0044464 cell part; GO:0005622 intr…	GO:0097159 organic cyclic compound binding; GO:1901363 heterocyclic compound binding; GO:0003729 mRNA binding; GO:0003723 RNA binding; GO:1901265 nucleoside phosphate binding; GO:0005488 binding; GO:0003676 nucleic acid binding; GO:0005515 protein binding; GO:0030619 U1 snRNA binding; GO:0000166 nucleotide binding; GO:0017069 snRNA binding; GO:0036094 small molecule binding;	K11093	SNRP70; U1 small nuclear ribonucleoprotein 70kDa	ath03040 Spliceosome - Arabidopsis thaliana (thale cress);	IPR022023; IPR034143; IPR000504; IPR012677;	U1 small nuclear ribonucleoprotein of 70kDa N-terminal; snRNP70, RNA recognition motif; RNA recognition motif domain; Nucleotide-binding alpha-beta plait domain;
Q9SJB4	AT2G04570	GDSL esterase/lipase At2g04570 OS=Arabidopsis thaliana OX=3702 GN=At2g04570 PE=2 SV=1	0.707	Down	0.00027596	At2g04570	38.478	6.9	2	3	2	1.229	1.158	1.165	0.825	0.813	0.873	extracellular	GO:0016042 lipid catabolic process; GO:1901575 organic substance catabolic process; GO:0008152 metabolic process; GO:0044710 single-organism metabolic process; GO:0044712 single-organism catabolic process; GO:0044699 single-organism process; GO:0044238 primary metabolic process; GO:0009056 catabolic process; GO:0071704 organic substance metabolic process; GO:0006629 lipid metabolic process;	GO:0005576 extracellular region;	GO:0016787 hydrolase activity; GO:0003824 catalytic activity; GO:0016788 hydrolase activity, acting on ester bonds;				IPR001087; IPR013830;	GDSL lipase/esterase; SGNH hydrolase-type esterase domain;
Q6ID88	AT3G26510	AT3G26510 protein OS=Arabidopsis thaliana OX=3702 GN=At3g26510 PE=2 SV=1	1.408	Up	0.0078165	At3g26510	21.014	23	5	5	5	0.859	0.851	0.763	1.06	1.133	1.289	chloroplast			GO:0005515 protein binding; GO:0005488 binding;				IPR000270;	PB1 domain;
Q9SU16	AT4G12700	At4g12700 OS=Arabidopsis thaliana OX=3702 GN=AT4G12700.1 PE=2 SV=1	1.447	Up	0.032123	AT4G12700.1	63.486	3	2	3	1	0.779	0.815	0.834	0.95	1.385	1.178	mitochondria		GO:0031224 intrinsic component of membrane; GO:0016020 membrane; GO:0016021 integral component of membrane; GO:0044425 membrane part;	GO:0016757 transferase activity, transferring glycosyl groups; GO:0003824 catalytic activity; GO:0016740 transferase activity;
Q8L7E9	AT4G35920	Protein MID1-COMPLEMENTING ACTIVITY 1 OS=Arabidopsis thaliana OX=3702 GN=MCA1 PE=1 SV=1	0.753	Down	0.026078	MCA1	48.036	5	2	2	2	0.995	1.214	1.245	0.85	0.816	0.934	nucleus	GO:0050794 regulation of cellular process; GO:0044700 single organism signaling; GO:0033554 cellular response to stress; GO:0065008 regulation of biological quality; GO:0072511 divalent inorganic cation transport; GO:0034220 ion transmembrane transport; GO:0009628 response to abiotic stimulus; GO:0030001 metal ion transport; GO:0044699 single-organism process; GO:0050896 response to stimulus; GO:…	GO:0016020 membrane; GO:0031226 intrinsic component of plasma membrane; GO:0044459 plasma membrane part; GO:0044425 membrane part; GO:0044464 cell part; GO:0071944 cell periphery; GO:0031224 intrinsic component of membrane; GO:0005887 integral component of plasma membrane; GO:0005623 cell; GO:0016021 integral component of membrane; GO:0005886 plasma membrane;	GO:0015075 ion transmembrane transporter activity; GO:0022803 passive transmembrane transporter activity; GO:0022892 substrate-specific transporter activity; GO:0015267 channel activity; GO:0022891 substrate-specific transmembrane transporter activity; GO:0046873 metal ion transmembrane transporter activity; GO:0072509 divalent inorganic cation transmembrane transporter activity; GO:0022838 subst…
Q9S831	AT4G28750	Photosystem I reaction center subunit IV A, chloroplastic OS=Arabidopsis thaliana OX=3702 GN=PSAE1 PE=1 SV=1	0.563	Down	3.9309e-05	PSAE1	14.967	29.4	3	7	2	1.28	1.304	1.313	0.693	0.762	0.74	chloroplast	GO:0008152 metabolic process; GO:0042221 response to chemical; GO:0009719 response to endogenous stimulus; GO:0010033 response to organic substance; GO:0009725 response to hormone; GO:0050896 response to stimulus; GO:0009735 response to cytokinin; GO:0009987 cellular process; GO:0044237 cellular metabolic process; GO:0015979 photosynthesis;	GO:0016020 membrane; GO:0009535 chloroplast thylakoid membrane; GO:0044434 chloroplast part; GO:0098796 membrane protein complex; GO:0009534 chloroplast thylakoid; GO:0005737 cytoplasm; GO:0042651 thylakoid membrane; GO:0032991 macromolecular complex; GO:0044424 intracellular part; GO:0005623 cell; GO:0009941 chloroplast envelope; GO:0044422 organelle part; GO:0044425 membrane part; GO:0009538 ph…		K02693	psaE; photosystem I subunit IV	ath00195 Photosynthesis - Arabidopsis thaliana (thale cress); ath01100 Metabolic pathways - Arabidopsis thaliana (thale cress);	IPR008990;	Electron transport accessory protein-like domain;
Q9FFJ0	AT5G17190	B-cell receptor-associated-like protein OS=Arabidopsis thaliana OX=3702 GN=MKP11.4 PE=2 SV=1	1.64	Up	0.0192757	MKP11.4	14.885	14.6	1	1	1	0.66	0.956	0.633	1.28	1.257	1.152	vacuolar membrane	GO:0046907 intracellular transport; GO:0016192 vesicle-mediated transport; GO:0048193 Golgi vesicle transport; GO:0071702 organic substance transport; GO:0015031 protein transport; GO:0051234 establishment of localization; GO:0051641 cellular localization; GO:0006810 transport; GO:0045184 establishment of protein localization; GO:0070727 cellular macromolecule localization; GO:0051649 establishme…	GO:0043229 intracellular organelle; GO:0016020 membrane; GO:0042175 nuclear outer membrane-endoplasmic reticulum membrane network; GO:0005783 endoplasmic reticulum; GO:0044446 intracellular organelle part; GO:0005737 cytoplasm; GO:0031224 intrinsic component of membrane; GO:0012505 endomembrane system; GO:0044424 intracellular part; GO:0005623 cell; GO:0016021 integral component of membrane; GO:0…
F4IN68	AT2G48100	Exonuclease family protein OS=Arabidopsis thaliana OX=3702 GN=At2g48100 PE=4 SV=1	0.721	Down	0.0010807	At2g48100	27.255	14.9	4	4	4	1.177	1.245	1.1	0.869	0.843	0.826	nucleus	GO:0008152 metabolic process; GO:0006725 cellular aromatic compound metabolic process; GO:0090304 nucleic acid metabolic process; GO:0046483 heterocycle metabolic process; GO:0006139 nucleobase-containing compound metabolic process; GO:1901360 organic cyclic compound metabolic process; GO:0006807 nitrogen compound metabolic process; GO:0034641 cellular nitrogen compound metabolic process; GO:0043…		GO:0097159 organic cyclic compound binding; GO:1901363 heterocyclic compound binding; GO:0003824 catalytic activity; GO:0005488 binding; GO:0003676 nucleic acid binding; GO:0016788 hydrolase activity, acting on ester bonds; GO:0004518 nuclease activity; GO:0043167 ion binding; GO:0043169 cation binding; GO:0046872 metal ion binding; GO:0004527 exonuclease activity; GO:0016787 hydrolase activity;				IPR015880; IPR012337; IPR007087; IPR013520; IPR013087;	Zinc finger, C2H2-like; Ribonuclease H-like domain; Zinc finger, C2H2; Exonuclease, RNase T/DNA polymerase III; Zinc finger C2H2-type/integrase DNA-binding domain;
A0A1P8B383	AT4G31820	Phototropic-responsive NPH3 family protein OS=Arabidopsis thaliana OX=3702 GN=ENP PE=3 SV=1	1.301	Up	0.032341	ENP	58.39	3.7	2	2	2	0.903	0.903	0.79	1.159	1.235	0.984	chloroplast							IPR011333; IPR027356;	SKP1/BTB/POZ domain; NPH3 domain;
Q501F9	AT5G02760	Probable protein phosphatase 2C 67 OS=Arabidopsis thaliana OX=3702 GN=At5g02760 PE=2 SV=1	1.314	Up	0.00033599	At5g02760	41.334	10.5	3	3	3	0.836	0.879	0.865	1.105	1.172	1.112	chloroplast	GO:0051093 negative regulation of developmental process; GO:1900056 negative regulation of leaf senescence; GO:0044267 cellular protein metabolic process; GO:0051241 negative regulation of multicellular organismal process; GO:0048519 negative regulation of biological process; GO:0006470 protein dephosphorylation; GO:0044238 primary metabolic process; GO:0044237 cellular metabolic process; GO:0016…	GO:0044424 intracellular part; GO:0005623 cell; GO:0044464 cell part; GO:0005622 intracellular; GO:0005737 cytoplasm;	GO:0042578 phosphoric ester hydrolase activity; GO:0003824 catalytic activity; GO:0005488 binding; GO:0004722 protein serine/threonine phosphatase activity; GO:0016791 phosphatase activity; GO:0043167 ion binding; GO:0016788 hydrolase activity, acting on ester bonds; GO:0046872 metal ion binding; GO:0043169 cation binding; GO:0005515 protein binding; GO:0016787 hydrolase activity; GO:0004721 phos…				IPR001932;	PPM-type phosphatase domain;
Q94AR4	AT4G14270	Polyadenylate-binding protein-interacting protein 2 OS=Arabidopsis thaliana OX=3702 GN=CID2 PE=2 SV=1	1.459	Up	0.00195912	CID2	16.656	23.8	3	4	3	0.833	0.841	0.77	1.121	1.151	1.294	cytoplasm
Q38944	AT2G38050	Steroid 5-alpha-reductase DET2 OS=Arabidopsis thaliana OX=3702 GN=DET2 PE=1 SV=2	0.723	Down	0.0152442	DET2	30.634	8.4	3	4	3	1.188	1.263	1.068	0.909	0.744	0.89	chloroplast	GO:0042446 hormone biosynthetic process; GO:0042445 hormone metabolic process; GO:0065008 regulation of biological quality; GO:0016132 brassinosteroid biosynthetic process; GO:0016129 phytosteroid biosynthetic process; GO:1901615 organic hydroxy compound metabolic process; GO:0044711 single-organism biosynthetic process; GO:0055114 oxidation-reduction process; GO:0008202 steroid metabolic process…	GO:0016020 membrane; GO:0044425 membrane part; GO:0044464 cell part; GO:0005622 intracellular; GO:0005737 cytoplasm; GO:0031224 intrinsic component of membrane; GO:0044424 intracellular part; GO:0005623 cell; GO:0016021 integral component of membrane;	GO:0016229 steroid dehydrogenase activity; GO:0016627 oxidoreductase activity, acting on the CH-CH group of donors; GO:0003865 3-oxo-5-alpha-steroid 4-dehydrogenase activity; GO:0009917 sterol 5-alpha reductase activity; GO:0047751 cholestenone 5-alpha-reductase activity; GO:0016628 oxidoreductase activity, acting on the CH-CH group of donors, NAD or NADP as acceptor; GO:0003824 catalytic activit…	K09591	DET2; steroid 5-alpha-reductase [EC:1.3.1.22]	ath00905 Brassinosteroid biosynthesis - Arabidopsis thaliana (thale cress); ath01100 Metabolic pathways - Arabidopsis thaliana (thale cress); ath01110 Biosynthesis of secondary metabolites - Arabidopsis thaliana (thale cress);	IPR001104;	3-oxo-5-alpha-steroid 4-dehydrogenase, C-terminal;
F4IX29	AT3G62040	Haloacid dehalogenase-like hydrolase (HAD) superfamily protein OS=Arabidopsis thaliana OX=3702 GN=At3g62040 PE=4 SV=1	0.702	Down	0.0022178	At3g62040	23.685	14.2	3	4	3	1.212	1.157	1.195	0.829	0.907	0.765	cytoplasm	GO:0008152 metabolic process;		GO:0016787 hydrolase activity; GO:0003824 catalytic activity;	K18551	SDT1; pyrimidine and pyridine-specific 5'-nucleotidase [EC:3.1.3.-]	ath00760 Nicotinate and nicotinamide metabolism - Arabidopsis thaliana (thale cress);	IPR023214;	HAD-like domain;
F4KC77	AT5G64010	U2 small nuclear ribonucleoprotein auxiliary factor-like protein OS=Arabidopsis thaliana OX=3702 GN=MBM17.11 PE=1 SV=1	1.382	Up	0.00061612	MBM17.11	26.164	3.8	1	1	1	0.836	0.864	0.803	1.095	1.181	1.182	nucleus	GO:0009414 response to water deprivation; GO:0001101 response to acid chemical; GO:0010118 stomatal movement; GO:0042221 response to chemical; GO:0090332 stomatal closure; GO:0006950 response to stress; GO:0009415 response to water; GO:0009628 response to abiotic stimulus; GO:0044763 single-organism cellular process; GO:1901700 response to oxygen-containing compound; GO:0044699 single-organism pr…
P50700	AT4G11650	Osmotin-like protein OSM34 OS=Arabidopsis thaliana OX=3702 GN=OSM34 PE=2 SV=2	1.403	Up	0.0055033	OSM34	26.633	4.1	1	1	1	0.865	0.88	0.734	1.117	1.149	1.213	chloroplast	GO:0009817 defense response to fungus, incompatible interaction; GO:0009620 response to fungus; GO:0006970 response to osmotic stress; GO:0006950 response to stress; GO:0042742 defense response to bacterium; GO:0009628 response to abiotic stimulus; GO:0098542 defense response to other organism; GO:0002376 immune system process; GO:0043207 response to external biotic stimulus; GO:0009651 response …
Q9FJL3	AT5G48570	Peptidyl-prolyl cis-trans isomerase FKBP65 OS=Arabidopsis thaliana OX=3702 GN=FKBP65 PE=1 SV=1	1.553	Up	0.00130223	FKBP65	65.222	5.7	4	7	3	0.821	0.767	0.712	1.245	1.107	1.221	cytoplasm	GO:0033554 cellular response to stress; GO:0051716 cellular response to stimulus; GO:0010286 heat acclimation; GO:0006950 response to stress; GO:0009628 response to abiotic stimulus; GO:0061077 chaperone-mediated protein folding; GO:0044267 cellular protein metabolic process; GO:0070370 cellular heat acclimation; GO:0000413 protein peptidyl-prolyl isomerization; GO:0018208 peptidyl-proline modifi…	GO:0043226 organelle; GO:0043231 intracellular membrane-bounded organelle; GO:0043229 intracellular organelle; GO:0005634 nucleus; GO:0044464 cell part; GO:0005622 intracellular; GO:0005737 cytoplasm; GO:0005773 vacuole; GO:0044424 intracellular part; GO:0043227 membrane-bounded organelle; GO:0005623 cell; GO:0044444 cytoplasmic part;	GO:0097159 organic cyclic compound binding; GO:1901363 heterocyclic compound binding; GO:0003755 peptidyl-prolyl cis-trans isomerase activity; GO:0016853 isomerase activity; GO:0003824 catalytic activity; GO:0005488 binding; GO:0005515 protein binding; GO:0008144 drug binding; GO:0005528 FK506 binding; GO:0005527 macrolide binding; GO:0005516 calmodulin binding; GO:0016859 cis-trans isomerase act…	K01802	E5.2.1.8; peptidylprolyl isomerase [EC:5.2.1.8]		IPR011990; IPR013026; IPR001179;	Tetratricopeptide-like helical domain; Tetratricopeptide repeat-containing domain; FKBP-type peptidyl-prolyl cis-trans isomerase domain;
A0A1P8B6E0	AT4G15570	P-loop containing nucleoside triphosphate hydrolases superfamily protein OS=Arabidopsis thaliana OX=3702 GN=MAA3 PE=4 SV=1	1.732	Up	0.00025695	MAA3	81.059	5.5	4	4	4	0.743	0.706	0.726	1.329	1.155	1.283	chloroplast				K10706	SETX, ALS4; senataxin [EC:3.6.4.-]		IPR027417;	P-loop containing nucleoside triphosphate hydrolase;
Q9LHG0	AT3G12480	At3g12480/MQC3.32 OS=Arabidopsis thaliana OX=3702 GN=NF-YC11 PE=1 SV=1	1.308	Up	0.034621	NF-YC11	32.291	8.2	2	2	2	0.988	0.777	0.827	1.208	1.029	1.154	nucleus	GO:0050794 regulation of cellular process; GO:0010468 regulation of gene expression; GO:0006355 regulation of transcription, DNA-templated; GO:0031326 regulation of cellular biosynthetic process; GO:0080090 regulation of primary metabolic process; GO:0060255 regulation of macromolecule metabolic process; GO:0019219 regulation of nucleobase-containing compound metabolic process; GO:0010556 regulat…	GO:0043226 organelle; GO:0043231 intracellular membrane-bounded organelle; GO:0043229 intracellular organelle; GO:0005634 nucleus; GO:0044464 cell part; GO:0005622 intracellular; GO:0005737 cytoplasm; GO:0044424 intracellular part; GO:0005829 cytosol; GO:0043227 membrane-bounded organelle; GO:0005623 cell; GO:0044444 cytoplasmic part;	GO:0005515 protein binding; GO:0046982 protein heterodimerization activity; GO:0003700 transcription factor activity, sequence-specific DNA binding; GO:0005488 binding; GO:0001071 nucleic acid binding transcription factor activity; GO:0046983 protein dimerization activity;	K21752	DRAP1, NC2-alpha; Dr1-associated corepressor		IPR009072; IPR003958;	Histone-fold; Transcription factor CBF/NF-Y/archaeal histone domain;
Q84MC1	AT4G31290	Gamma-glutamylcyclotransferase 2-2 OS=Arabidopsis thaliana OX=3702 GN=GGCT2;2 PE=1 SV=1	0.74	Down	6.7817e-07	GGCT2;2	25.607	7.9	2	2	2	1.162	1.155	1.165	0.859	0.867	0.849	cytoplasm	GO:0006790 sulfur compound metabolic process; GO:0006518 peptide metabolic process; GO:0006807 nitrogen compound metabolic process; GO:0043603 cellular amide metabolic process; GO:0044237 cellular metabolic process; GO:0071704 organic substance metabolic process; GO:1901575 organic substance catabolic process; GO:0008152 metabolic process; GO:1901565 organonitrogen compound catabolic process; GO:…	GO:0044424 intracellular part; GO:0005623 cell; GO:0044464 cell part; GO:0005622 intracellular; GO:0005737 cytoplasm;	GO:0003839 gamma-glutamylcyclotransferase activity; GO:0016746 transferase activity, transferring acyl groups; GO:0003824 catalytic activity; GO:0016740 transferase activity; GO:0016755 transferase activity, transferring amino-acyl groups;	K22596	ath00480 Glutathione metabolism - Arabidopsis thaliana (thale cress); ath01100 Metabolic pathways - Arabidopsis thaliana (thale cress);		IPR013024;	Gamma-glutamyl cyclotransferase-like;
